# Supplementary material for: Regulatory mutations upstream of ppp2ca affect body weight in Asian seabass
Source: Research Square preprint supplement (doi:10.21203/rs.3.rs-7313879/v1), 2025-08-26
Supplement: Supplementary file 1 [file 5046772263d93bd449daed76.xlsx]

## Sheet: Sheet1
Supplementary Table 1: Primers for characterizing ppp2ca in Asian seabass
Identifying 3 SNPs from previous study
Lca-ppp2ca-F2	GGAATGAGATGTGCTGTGCA		Contains 2 SNPs
Lca-ppp2ca-R2	CCTGTCGACTAGGCAAAACC
Lca-ppp2ca-F4	AGGGACAAGTGAAAACACTT		Contains 1 SNP
Lca-ppp2ca-R4	ATCACTGCTTATTGGCTTCA
Amplifying ORF
Lca-ppp2ca-ORF-F	GTTTGGGCAGAGAAAACTGC
Lca-ppp2ca-ORF-R	TGTACAAGGGGTCGAAGGTC
Subcellular localisation
Lca-ppp2ca-GFP-EcoRI-F	CCCGAATTCCATGGACGAAAAGGCGTTT
Lca-ppp2ca-GFP-BamHI-R	CCCGGATCCTTACAGGAAGTAGTCTGGGGT
Overexpression ppp2ca
ppp2caOE-EcoRI-F	CCCGAATTCATGGACGAAAAGGCGTTT
ppp2caOE-Xbal-R	TGCTCTAGATTACAGGAAGTAGTCTGGGGT
Knockdown ppp2ca
shRNA-ppp2ca-1-F	CGCGGATCCGGGAAATCACCAGACACAAATTCAAGAGAGTTTGTGTCTGGTGATTTCCCGC
shRNA-ppp2ca-1-R	CCCAAGCTTGCGGGAAATCACCAGACACAAACTCTCTTGAATTTGTGTCTGGTGATTTCCC
shRNA-ppp2ca-2-F	CGCGGATCCGGAAATATGGTAACGCCAATGTTCAAGAGACATTGGCGTTACCATATTTCCTG
shRNA-ppp2ca-2-R	CCCAAGCTTCAGGAAATATGGTAACGCCAATGTCTCTTGAACATTGGCGTTACCATATTTCC
shRNA-ppp2ca-3-F	CGCGGATCCGGGTTACAACTGGTGCCATGATTCAAGAGATCATGGCACCAGTTGTAACCCTC
shRNA-ppp2ca-3-R	CCCAAGCTTGAGGGTTACAACTGGTGCCATGATCTCTTGAATCATGGCACCAGTTGTAACCC
qRT-PCR
ppp2ca-qRT-1-F	GTGACGTGCATGGCCAGTTCCA
ppp2ca-qRT-1-R	GTCTGCTCTCGTGGTTCCCCCT
Luciferase Assay
ppp9640del5UTR-F	CACCGCTAGCTGCCCTTTAAACAGACAGTGA
ppp9640del5UTR-R	CACCCTCGAGTTCTGTGTGTTTTCGGGGTC
Visualising 10-bp insertion/ 218-bp deletion through gel electrophoresis
ppp5utr-218del-F	CCTGGTCCAAAAGGCATCT
ppp5utr-218del-R	CCAAAACTAATGGCCATGTTCG
ppp5utr-10ins-F	CACCGCTAGCAGGGGTTGTATGTGTTAAAGCA
ppp5utr-10ins-R	CACCCTCGAGTTTGGACCAGGATCTGCTTC
