# Supplementary material for: Regulatory mutations upstream of ppp2ca affect body weight in Asian seabass
Source: Research Square preprint supplement (doi:10.21203/rs.3.rs-7313879/v1), 2025-08-26
Supplement: Supplementary file 2 [file b7979afe1aa62db1ccb8d23f.xlsx]

## Sheet: Supplementary Table 2
Supplementary Table 2: Predicted transcription factors binding to mutations upstream of ppp2ca
motif_id	motif_alt_id	sequence_name	start	stop	strand	score	p-value	q-value	matched_sequence
MA1597.1	ZNF528	10	11	27	+	9.81633	1.49e-05	0.00128	CCCGAGGGAGTCATCCC
MA1637.2	EBF3	10	11	19	+	13.4878	1.66e-05	0.00154	CCCGAGGGA
MA1604.2	Ebf2	10	11	19	+	13.3252	1.71e-05	0.00159	CCCGAGGGA
MA2122.1	Ebf4	10	9	19	+	12.3901	2.19e-05	0.000984	TCCCCGAGGGA
MA0154.5	EBF1	10	9	19	+	11.9504	2.76e-05	0.00128	TCCCCGAGGGA
MA2122.1	Ebf4	10	9	19	-	11.8652	3.01e-05	0.000984	TCCCTCGGGGA
MA2122.1	Ebf4	10	24	34	+	11.8652	3.01e-05	0.000984	TCCCAAAGGGA
MA0154.5	EBF1	10	24	34	+	11.7518	3.05e-05	0.00128	TCCCAAAGGGA
MA0154.5	EBF1	10	9	19	-	11.3333	3.91e-05	0.00128	TCCCTCGGGGA
MA0756.3	ONECUT2	10	33	40	+	13.0192	3.96e-05	0.00374	GATCAATA
MA0003.5	TFAP2A	10	10	18	-	10.5772	7.11e-05	0.00678	CCCTCGGGG
MA1604.2	Ebf2	10	26	34	+	10.6504	7.57e-05	0.00352	CCAAAGGGA
MA0679.3	ONECUT1	10	32	40	+	10.7064	7.84e-05	0.0073	GGATCAATA
MA1569.2	TFAP2E	10	10	18	+	11.898	7.86e-05	0.00367	CCCCGAGGG
MA1569.2	TFAP2E	10	10	18	-	11.8776	8.05e-05	0.00367	CCCTCGGGG
MA0814.3	TFAP2C	10	10	18	+	10.2276	9.39e-05	0.00905	CCCCGAGGG
MA1637.2	EBF3	10	26	34	+	10.3415	9.65e-05	0.00449	CCAAAGGGA
MA0909.4	Hoxd13	10	36	42	+	12.7273	9.66e-05	0.0085	CAATAAA
# FIMO (Find Individual Motif Occurrences): Version 5.5.5 compiled on Dec 6 2023 at 19:32:37
# The format of this file is described at https://meme-suite.org/meme/doc/fimo-output-format.html#tsv_results.
# fimo --oc . --verbosity 1 --bgfile --nrdb-- --thresh 1.0E-4 JASPAR2024_CORE_vertebrates_non-redundant_pfms_jaspar.txt 10_to_68.fa
